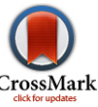

# The C2238/ $\alpha$ ANP Variant Is a Negative Modulator of Both Viability and Function of Coronary Artery Smooth Muscle Cells

Speranza Rubattu<sup>1,2\*</sup>, Simona Marchitti<sup>1</sup>, Franca Bianchi<sup>1</sup>, Sara Di Castro<sup>1</sup>, Rosita Stanzione<sup>1</sup>, Maria Cotugno<sup>1</sup>, Cristina Bozzao<sup>2</sup>, Sebastiano Sciarretta<sup>1</sup>, Massimo Volpe<sup>1,2</sup>

**1** IRCCS Neuromed, Pozzilli (Isernia), Italy, **2** Department of Clinical and Molecular Medicine, School of Medicine and Psychology, University Sapienza of Rome, Ospedale S. Andrea, Rome, Italy

## Abstract

**Background:** Abnormalities of vascular smooth muscle cells (VSMCs) contribute to development of vascular disease. Atrial natriuretic peptide (ANP) exerts important effects on VSMCs. A common ANP molecular variant (T2238C/ $\alpha$ ANP) has recently emerged as a novel vascular risk factor.

**Objectives:** We aimed at identifying effects of CC2238/ $\alpha$ ANP on viability, migration and motility in coronary artery SMCs, and the underlying signaling pathways.

**Methods and Results:** Cells were exposed to either TT2238/ $\alpha$ ANP or CC2238/ $\alpha$ ANP. At the end of treatment, cell viability, migration and motility were evaluated, along with changes in oxidative stress pathway (ROS levels, NADPH and eNOS expression), on Akt phosphorylation and miR21 expression levels. CC2238/ $\alpha$ ANP reduced cell vitality, increased apoptosis and necrosis, increased oxidative stress levels, suppressed miR21 expression along with consistent changes of its molecular targets (PDCD4, PTEN, Bcl2) and of phosphorylated Akt levels. As a result of increased oxidative stress, CC2238/ $\alpha$ ANP markedly stimulated cell migration and increased cell contraction. NPR-C gene silencing with specific siRNAs restored cell viability, miR21 expression, and reduced oxidative stress induced by CC2238/ $\alpha$ ANP. The cAMP/PKA/CREB pathway, driven by NPR-C activation, significantly contributed to both miR21 and phosphoAkt reduction upon CC2238/ $\alpha$ ANP. miR21 overexpression by mimic-hsa-miR21 rescued the cellular damage dependent on CC2238/ $\alpha$ ANP.

**Conclusions:** CC2238/ $\alpha$ ANP negatively modulates viability through NPR-C/cAMP/PKA/CREB/miR21 signaling pathway, and it augments oxidative stress leading to increased migratory and vasoconstrictor effects in coronary artery SMCs. These novel findings further support a damaging role of this common  $\alpha$ ANP variant on vessel wall and its potential contribution to acute coronary events.

**Citation:** Rubattu S, Marchitti S, Bianchi F, Di Castro S, Stanzione R, et al. (2014) The C2238/ $\alpha$ ANP Variant Is a Negative Modulator of Both Viability and Function of Coronary Artery Smooth Muscle Cells. PLoS ONE 9(11): e113108. doi:10.1371/journal.pone.0113108

**Editor:** Junming Yue, The University of Tennessee Health Science Center, United States of America

**Received:** June 28, 2014; **Accepted:** October 15, 2014; **Published:** November 17, 2014

**Copyright:** © 2014 Rubattu et al. This is an open-access article distributed under the terms of the Creative Commons Attribution License, which permits unrestricted use, distribution, and reproduction in any medium, provided the original author and source are credited.

**Data Availability:** The authors confirm that all data underlying the findings are fully available without restriction. All relevant data are within the paper and its Supporting Information files.

**Funding:** This work was supported by a grant (Ricerca Corrente) from the Italian Ministry of Health to MV and SR; by the 5% grant to MV and SR. The funder had no role in study design, data collection and analysis, decision to publish, or preparation of the manuscript.

**Competing Interests:** The authors have declared that no competing interests exist.

\* Email: rubattu.speranza@neuromed.it

## Introduction

Atrial natriuretic peptide (ANP) is a cardiovascular hormone which exerts several beneficial properties on both cardiovascular hemodynamic and structure [1]. Its vasorelaxant, diuretic and natriuretic effects are mediated by the membrane-bound guanylyl cyclase type A receptor (GC-A) through an increase of cyclic guanylate monophosphate (cGMP) levels. On the other hand, ANP binding to natriuretic peptide type C (NPR-C) receptor is known to mediate its clearance [1]. ANP exerts its vasodilatory property by inducing vascular smooth muscle cell (VSMC) relaxation [1]. Previous evidence indicates that ANP can also reduce VSMC proliferation [2]. Notably, microRNAs may be

involved in these effects since miRNA-21 was shown to contribute to the antiproliferative effect of ANP in human aortic SMCs [3].

VSMCs play a relevant role in vessel physiology and disease [4]. In particular, based on their ability to adapt to various stimuli, they can participate to either the vascular repair process or to the vascular disease condition such as atherosclerotic plaque formation [5]. Importantly, VSMCs are also required to maintain stability of atherosclerotic plaques [6]. These evidences suggest that, by regulating VSMC biological functions, ANP may contribute to both physiological and pathological vascular processes.

The common T2238C molecular variant of human  $\alpha$ ANP is emerging as a novel cardiovascular risk factor for its ability to increase the risk of cardiovascular events both in coronary artery

disease patients and in the general population [7–12], along with a significant impairment of endothelium-dependent vasodilation [13]. These negative effects result from deregulated activation of NPR-C by CC2238/ $\alpha$ ANP variant [13].

The impact of CC2238/ $\alpha$ ANP on VSMCs has not been explored yet. Since its understanding may integrate knowledge on mechanisms of vascular disease promotion dependent on this common  $\alpha$ ANP molecular variant, we performed the present studies to explore: 1) the effects of CC2238/ $\alpha$ ANP on coronary artery SMC (CASM) viability, migration and motility; 2) the pathways underlying alterations of viability and function dependent on CC2238/ $\alpha$ ANP in CASMs; 3) the implication of NPR-C driven cAMP/PKA/CREB pathway in modulating cellular viability through phosphoAkt and miR21 regulation in the presence of CC2238/ $\alpha$ ANP.

## Materials and Methods

### 1. Effects of exposure to TT2238 and CC2238/ $\alpha$ ANP in CASMs

Commercially available CASMs (human coronary artery smooth muscle cells obtained from normal donors, Cat. No CC-2583), purchased from Lonza (Walkersville, MD, USA), were grown in Smooth Muscle Growth Medium-2 (SmgM-2). They were used within the 5th passage and at 70% confluence for the following sets of experiments after an overnight exposure (12 hrs) to either TT2238/ $\alpha$ ANP (wild type) or CC2238/ $\alpha$ ANP (variant) at  $10^{-9}$  M concentration, as previously reported for endothelial cells (ECs) [13]. This concentration has been used in our studies to better mimic the physiological condition of vascular cells exposed to both circulating and endogenous  $\alpha$ ANP. Once exposure to either  $\alpha$ ANP form was completed, variables described below were assessed 24 hrs later. From three to six experiments were performed for each of the following studies.

**Cell viability assessment by trypan blue assay.** Cells were seeded in 60-mm well plates ( $2 \times 10^5$  cells/well), cultured in their medium for 24 hrs, and subsequently stimulated with either TT2238- or CC2238/ $\alpha$ ANP for 12 hrs in the presence of 10% fetal bovine serum (FBS). Twenty-four hrs later, viable and dead cells were counted using the Trypan blue exclusion method under an optical microscope, as previously described [13].

**Cell viability assessment by Annexin V-PI staining.** Counting of apoptotic cells was performed by flow cytometry analysis (FACS) using Annexin V-Fitc and Propidium Iodide (PI) staining (ImmunoStep, Salamanca, Spain). For this purpose, 24 hrs after completion of overnight exposure to either  $\alpha$ ANP form, CASMs were harvested by incubation with 1 ml of trypsin/EDTA (Lonza) for 3 min at 37°C. Trypsinization was stopped by addition of medium and the suspension was centrifuged at 1200 rpm for 5 min. at 4°C. Each pellet was washed with cold phosphate buffered saline (PBS 1x). Then, tubes were vortexed thoroughly and centrifuged again as before. Cells were gently resuspended and vortexed in binding buffer at a concentration of  $3 \times 10^6$  cells/ml. Then, 100  $\mu$ l of cell suspension was added to 5  $\mu$ l of Annexin V-Fitc and 10  $\mu$ l of PI. Samples were mixed for 15 min. in the dark at 4°C and 400  $\mu$ l of PBS 1x was added to the solution. Ten thousand cells were analyzed by FACS on a BD Accuri C6 flow cytometer to count apoptotic cells. Both negative control (untreated cells) and positive control (cells treated with hydrogen peroxide) were included in the analysis.

**Reactive oxygen species (ROS) levels assessment.** Oxidative stress was evaluated 24 hrs after completion of exposure to either  $\alpha$ ANP form by applying the DCHF procedure, as previously described [13].

**Cell migration assay.** To test cell migration, CASMs were seeded in 24-well plates ( $8 \times 10^4$  cells/well), cultured in their medium for 24 hrs, subsequently starved and stimulated with either TT2238- or CC2238/ $\alpha$ ANP form for 12 hrs in the presence of 10% FCS. At the end of stimulation, cells were resuspended in their medium, starved and seeded in Boyden chambers (BD Biosciences, San Jose, California, USA) to test migration (chemotaxis). In fact, following a 24-hrs period of incubation, cells migrated from the upper part of the chamber to the lower filter were fixed by Diff Quick (Dade Behring, Paris, France) and visualized by microscopy. To test the involvement of both ROS and cAMP levels in modulating the migratory property of CASMs upon CC2238/ $\alpha$ ANP, separate sets of experiments were performed in the presence of apocynin (200 mmol/l, Sigma) and of forskolin (FSK, 10  $\mu$ M, Sigma).

**Collagen gel lattice contraction assay.** To test cell contraction, a commercially available kit assay was used (Cell Biolabs, San Diego, CA, USA). Two parts of cells were mixed with eight parts of collagen gel lattice mixture and they were plated for 1 hr at 37°C. Thereafter, 1 ml of medium was added and incubated for 2 days. Next, the gels were released from the sides of the wells and full release was allowed for 24 hrs. During the last 12 hrs of release either  $10^{-9}$  M TT2238- or CC2238/ $\alpha$ ANP was added to cells. After completion of incubation, the area of gel lattice was taken with Image J software, and the relative lattice area was obtained by dividing the area of the well 24 hrs after detachment by the initial area of the well. To test the involvement of both ROS and cAMP levels in modulating cell motility upon CC2238/ $\alpha$ ANP, separate sets of experiments were performed in the presence of apocynin (200 mmol/l) and of FSK (10  $\mu$ M).

### 2. Investigation of the signaling involved in the negative effects of CC2238/ $\alpha$ ANP in CASMs

From three to six experiments were performed for each of the following studies, unless otherwise indicated.

**Cyclic adenylyl monophosphate (cAMP) and cyclic guanylyl monophosphate (cGMP) levels measurement.** For this purpose, CASMs were seeded in six-well plates ( $2 \times 10^5$  cells/well) and cultured in SmgM-2 medium for 24 hrs. At this time, they were first starved for 2 hrs and then pretreated for 30 min. with 0.1 mmol/L isobutylmethylxanthine (IBMX, Sigma) before stimulation with the conditioned medium containing IBMX 0.1 mM and either TT2238 or CC2238/ $\alpha$ ANP at  $10^{-9}$  M concentration for 30 min., based on our own data [13] and on previously published protocols [14]. cGMP and cAMP measurements were performed with specific enzymeimmunoassay Biotrak (EIA) System (Amersham, Piscataway, New Jersey, USA), following the manufacturer's instructions (number of experiments = 12). To better assess guanylyl cyclase activity following binding of both  $\alpha$ ANP forms with GC-A (natriuretic peptide type A receptor, NPR-A), a dose-response curve was performed by using a range of concentrations included between  $10^{-11}$  and  $10^{-6}$  M of each peptide. Furthermore, to support the involvement of NPR-C, rather than NPR-A, in mediating deleterious effects of CC2238/ $\alpha$ ANP, we assessed its impact on cell viability (by trypan blue) in the presence of 500 nM anantin (NPR-A antagonist that blocks cGMP release [15]).

**Analysis of miR21 expression.** At the end of exposure to either  $\alpha$ ANP form, microRNA from cells was immediately obtained using mirVana miRNA isolation kit (Applied Biosystems, CA, USA). The RT reaction for miR21 and for U75-control miR was performed using TaqMan MicroRNA Reverse Transcription Kit (Applied Biosystems, Milan, Italy). Two ng/ $\mu$ l of RNA, 1X stem-loop RT primer, 3.33 U/ $\mu$ l reverse transcriptase, 0.25 U/

$\mu$ L RNase inhibitor, 0.25 mM dNTPs, and 1X reaction buffer were run in a total reaction volume of 15  $\mu$ L and incubated at 16°C for 30 min, 42°C for 30 min, and 85°C for 5 min in a thermal cycler. 0.8  $\mu$ L of the RT reaction was combined with 0.5  $\mu$ L of a specific TaqMan MicroRNA Assay (U75-control, miR-21, 20X; forward primer, reverse primer, and probe) and 5  $\mu$ L of TaqMan Universal PCR Master Mix in a 10  $\mu$ L final volume. Real-time (RT)-PCR was performed using an Applied Biosystems 7900HT Fast Real-Time PCR System with cycling conditions of 95°C for 10 min followed by 95°C for 15 sec and 60°C for 60 sec for a total of 40 cycles. Each TaqMan assay was run in triplicate. Results were expressed as relative levels of each microRNA comparing different treatments.

A separate set of studies tested the role of cGMP dependent kinase (cGK) in mediating the 50% miR21 reduction dependent on wild type  $\alpha$ ANP. We used cGK inhibitor (Rp-8-Br-PET-cGMPS, Sigma) at concentration of 25  $\mu$ M for 30 min. followed by overnight exposure to wild type  $\alpha$ ANP.

**Western blot analysis of Akt, NADPH (gp91 phox subunit), eNOS, miR21 targets (PDCD4, PTEN, Bcl2).** To determine protein expression levels 24 hrs after completion of exposure to either TT2238- or CC2238/ $\alpha$ ANP, samples were lysed in 1:10 weight/volume in lysis buffer (50 mM NaCl, 100 mM Tris-HCl pH 7.4, 1 mM EDTA, 1% SDS) supplemented with protease and phosphatase inhibitors (Sigma). Samples were incubated on ice for 15 min. and centrifuged at 13000 rpm for 15 min. Protein concentration was determined by DC Protein Assay Kit (Bio-Rad, Hercules, CA, USA) following manufacturer's instructions. Protein lysates were boiled at 95°C for 10 min. in presence of gel loading buffer (Bio-Rad). 50  $\mu$ g of each sample were loaded on 10% SDS-polyacrylamide gel and run for 120 min. at 100 V. Proteins were then transferred to polyvinylidene difluoride membranes (Amersham) using the Trans-Blot Turbo Transfer System (Bio-Rad). Non specific binding sites were blocked at room temperature for 1 hr in 5% skim-milk in Tris-buffered saline buffer +0.1% Tween 20 (Sigma) (TBS-T). Membranes were incubated at 4°C overnight with primary antibodies diluted in 5% bovine serum albumine (BSA) in TBS-T. The following primary antibodies were used: 1:200 rabbit polyclonal anti-protein kinase B (Akt) (Cat. No. 9272) and 1:200 rabbit polyclonal anti-p-Akt (Ser413) (Cat. No. 9271) both purchased from Cell Signaling Technologies (Danvers, MA, USA); 1:200 donkey polyclonal antibody anti-gp91-phox subunit of nicotinamide adenine dinucleotide phosphate (NADPH) (Cat. No. sc-5827, Santa Cruz Biotechnology, Santa Cruz, CA, USA); 1:200 mouse monoclonal anti-endothelial nitric oxide synthase (eNOS), Cat. No 5880, Cell Signaling; 1:200 rabbit polyclonal antibody anti-phospho-eNOS (Ser1177) Cat. No 9571, Cell Signaling; 1:200 rabbit monoclonal antibody anti-phosphatase and tensin homolog (PTEN) (Cat. No 9559, Cell Signaling); 1:200 rabbit monoclonal anti-programmed cell death protein 4 (PDCD4), Cat. No 9535, Cell Signaling; 1:200 rabbit polyclonal anti-B-cell lymphoma 2 (Bcl2), Cat. No sc-492, Santa Cruz Biotechnology; 1:5000 anti- $\beta$ -actin (Cat. No A5441, Sigma) used as housekeeping gene. Following three washes of 10 min. in TBS-T, membranes were incubated for 1 hr at room temperature with 1:5000 horseradish peroxidase-conjugated secondary antibody goat anti-rabbit (Cat. No sc-2004, Santa Cruz) or goat anti-mouse (Cat. No sc-2005, Santa Cruz) diluted in 5% BSA. After three washes of 10 min. in TBS-T, signals were revealed with an enhanced chemiluminescence detection system (Luminata Crescendo, Millipore, Darmstadt, Germany) and the immunoreactivity of bands was visualized on a high-performance chemiluminescence apparatus (ChemiDoc MP System, Bio-Rad). Protein bands were scanned and quantified

densitometrically. They were finally normalized using  $\beta$ -actin levels.

### 3. Impact of NPR-C gene silencing in CSMCs in the presence of CC2238/ $\alpha$ ANP

NPR-C gene silencing was performed once cells had reached 70% confluence. At this time, they were washed with PBS 1x, and OPTI-MEM-reduced serum medium (Invitrogen, Milan, Italy) was added to the cells. Two NPR-C specific small interfering RNAs (Mission siRNA, Sigma) and a nucleic acid transferring agent (RNA I Max lipofectamine, Invitrogen) were incubated in OPTI-MEM reduced serum medium for 20 min. at room temperature to form a siRNA-lipofectamine complex. The siRNA-lipofectamine complex-containing medium was added to the cells to a final siRNA concentration of 50 nM. Five hrs later, the complex-containing medium was replaced with SmGM-2 supplemented with 10% FBS. Cells transfected with lipofectamine and nonsense siRNA (Sigma Aldrich) were used as control. Twenty-four hrs later, both silenced and not silenced cells were exposed to CC2238/ $\alpha$ ANP for 12 hrs and subsequently analyzed for: cell viability, eNOS and NADPH protein expression levels, ROS levels, cell migration, cell contraction, miR21 and related targets (PTEN, PDCD4, Bcl2) expression, Akt phosphorylation levels. Six experiments were performed for these studies.

### 4. Impact of miR21 overexpression in CSMCs in the presence of CC2238/ $\alpha$ ANP

Cells were used at 70% confluence. Mimic hsa-miR21 (Mission microRNA, Sigma) and RNA I Max lipofectamine were incubated in OPTI-MEM reduced serum for 20 min. at room temperature to form a mimic-lipofectamine complex. The complex containing medium was added to the cells to reach a final mimic miR21 concentration of 100 nM. Five hrs later the complex containing medium was replaced with SmGM-2 supplemented with 10% FBS. Cells transfected with lipofectamine and Mission miRNA negative control (Sigma) were used as control. Twenty-four hrs after transfection cells overexpressing miR21 were exposed to CC2238/ $\alpha$ ANP for 12 hrs and used, 24 hrs later, for evaluation of: cell viability, ROS levels, NADPH and eNOS expression, cell migration and cell contraction, modulation of miR21 molecular targets (PTEN, PDCD4, Bcl2) and of Akt phosphorylation. Efficacy of miR21 overexpression was verified by RT-PCR, as reported above, at both two and four days following transfection. Six experiments were performed for these studies.

### 5. Is the NPR-C driven cAMP/Protein kinase A (PKA)/CREB axis related to miR21 and pAkt regulation in CSMCs upon CC2238/ $\alpha$ ANP exposure?

To explore the role of cAMP/PKA/CREB axis in CC2238/ $\alpha$ ANP dependent effects on CSMC viability, we evaluated both miR21 and Akt phosphorylation expression in the following sets of experiments:

-CC2238/ $\alpha$ ANP was co-incubated with 10  $\mu$ M FSK (in order to increase intracellular cAMP levels), as previously reported [13]. At the end of stimulation, we assessed expression levels of miR21 and, 24 hrs later, of Akt phosphorylation (as described above).

-CC2238/ $\alpha$ ANP was co-incubated with 10  $\mu$ M FSK and 15  $\mu$ M Dihydrochloride hydrate (H89, PKA inhibitor, Sigma). Modulation of both miR21 expression and pAkt phosphorylation levels was assessed as specified above.

-CC2238/ $\alpha$ ANP was co-incubated with 10  $\mu$ M FSK following either 60 or 120 min. pre-incubation with 25  $\mu$ M p300/CREB(CBP) (CREB inhibitor, Sigma). Modulation of both miR21 expression and pAkt phosphorylation levels was assessed as specified above.

## Statistical Analysis

Continuous variables are expressed as mean  $\pm$  SEM. Comparisons between 2 groups were performed using Student t test. When the analysis was adjusted for the multiplicity of compared groups, 1-way ANOVA followed by Bonferroni post hoc test was performed. SPSS statistical software (SPSS Inc, Chicago, IL, version 12.0) was used for statistical analysis.

A  $p < 0.05$  was considered significant.

## Results

### Effects of exposure of TT2238- and CC2238/ $\alpha$ ANP on cell viability, oxidative stress, migration and contraction in CSMCs

Cell viability was significantly impaired in cells exposed to CC2238/ $\alpha$ ANP (Fig. 1A, 1B, S1A). Consistently, apoptosis and necrosis were significantly increased by variant  $\alpha$ ANP (Fig. 1B, S1A). ROS levels were also markedly increased (Fig. 1C), along with a significant increase of gp91-phox subunit of NADPH

expression and a significant decrease of phosphorylated eNOS expression (Fig. 1D).

CC2238/ $\alpha$ ANP induced a marked increase of cell migration, as compared to TT2238/ $\alpha$ ANP (Fig. 2A), consistently with previous observations obtained in ECs [16]. A significant increase of cell contraction was detected upon CC2238/ $\alpha$ ANP exposure (Fig. 2B).

### Investigation of the signaling involved in the negative effects of CC2238 vs TT2238/ $\alpha$ ANP in CSMCs

Release of cAMP levels was dramatically reduced by CC2238/ $\alpha$ ANP, in contrast to wild type  $\alpha$ ANP (Fig. 3A). Levels of cGMP were remarkably increased by both wild type and variant  $\alpha$ ANP at all tested concentrations (Fig. 3B, S2A). Blocking of NPR-A with anantin did not avoid the deleterious effects of CC2238/ $\alpha$ ANP on cell viability, and it was associated with a marked cAMP levels decrease (S2B). Degree of Akt phosphorylation was significantly reduced by  $\alpha$ ANP variant only, similarly to what has been previously reported in ECs [13] (Fig. 3C).

Based on previous findings showing involvement of miR21 downregulation in the anti-proliferative effect of wild type  $\alpha$ ANP in aortic SMCs [3], we compared degree of miR21 modulation under either TT2238- or CC2238/ $\alpha$ ANP exposure. A marked suppression of miR21 expression was revealed upon exposure to CC2238/ $\alpha$ ANP, whereas TT2238/ $\alpha$ ANP reduced miR21 expression by 50% (Fig. 3D). Notably, the TT2238/ $\alpha$ ANP effect on

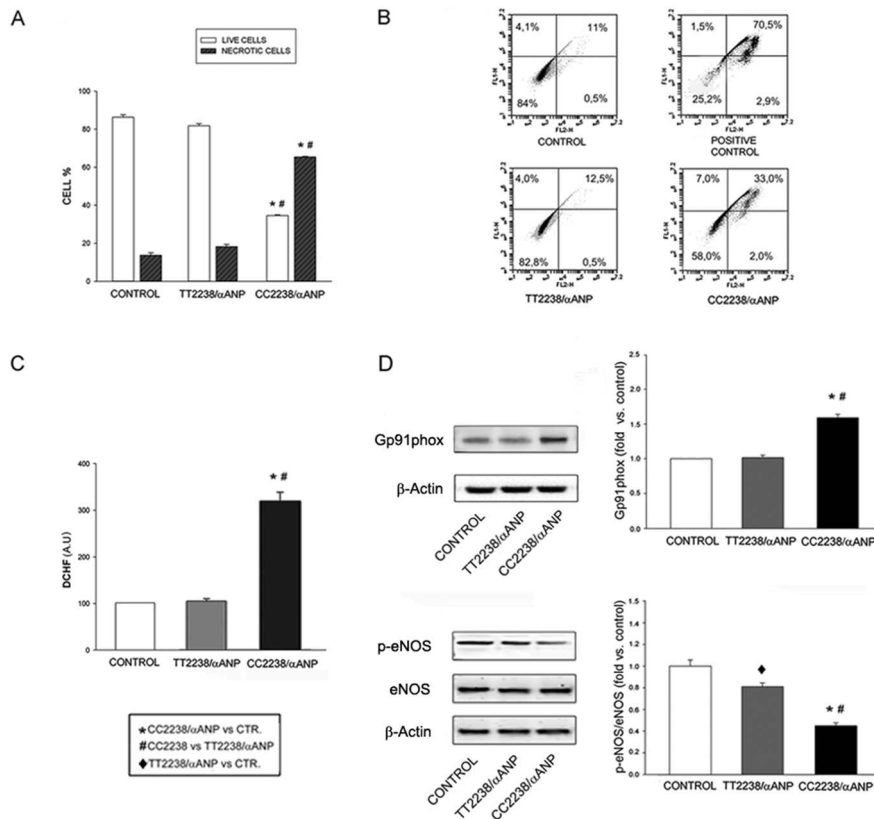

**Figure 1. Effects of exposure to either TT2238- or CC2238/ $\alpha$ ANP on viability and oxidative stress in CSMCs.** A. Cell vitality as determined by trypan blue (n=4); B. Cell vitality as assessed by FACS (n=4): representative scatter plots are shown with percentages of live cells (bottom left), early apoptotic cells (upper left), late apoptotic cells (upper right), necrotic cells (bottom right); C. ROS levels (n=6); D. NADPH and eNOS expression levels (n=3). Representative western blots are shown; bars represent results of densitometric analysis. Control (CTR): untreated cells; positive control: cells treated with H<sub>2</sub>O<sub>2</sub>. ♦  $p < 0.01$ ; for all other comparisons  $p < 0.0001$ . doi:10.1371/journal.pone.0113108.g001

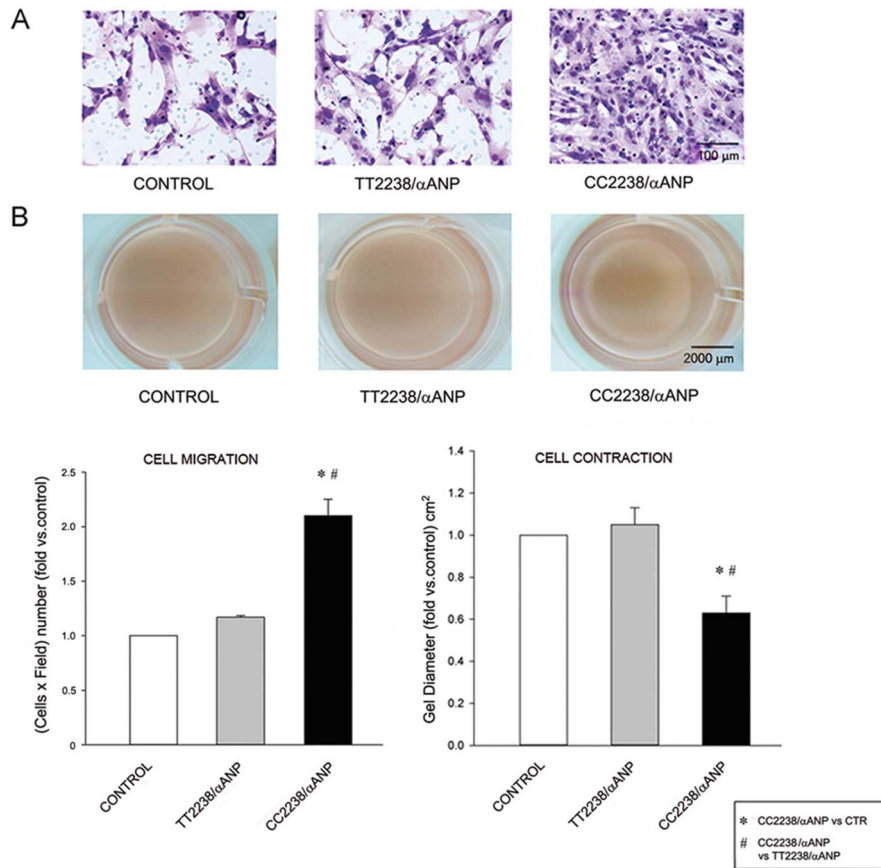

**Figure 2. Effects of exposure to either TT2238- or CC2238/ $\alpha$ ANP on cell migration and cell contraction.** Photos of cell migration (A) and of cell contraction (B) upon exposure of CASMCs to either TT2238/ $\alpha$ ANP or CC2238/ $\alpha$ ANP as compared to control (CTR). Results are plotted in the graphs at the bottom of the figure. Number of experiments = 4. \*#p<0.0001. doi:10.1371/journal.pone.0113108.g002

miR21 was mediated by cGMP dependent kinase (S3), confirming previous data [3].

Known targets of miR21 are Bcl2, PTEN and PDCD4 that are all involved in cell apoptosis, proliferation and growth (17–19). In fact, as a consequence of miR21 suppression, CC2238/ $\alpha$ ANP reduced Bcl2 expression and significantly increased both PTEN and PDCD4 expression levels (Fig. 3E), as key mechanisms underpinning its deleterious effects.

**Impact of NPRC gene silencing on detrimental effects induced by CC2238/ $\alpha$ ANP**

Silencing of NPR-C gene abolished the effects induced by CC2238/ $\alpha$ ANP on cell viability, cell apoptosis and necrosis (S1B). It also blunted ROS levels accumulation induced by CC2238/ $\alpha$ ANP (Fig. 4A). Both Akt phosphorylation (Fig. 4B) and miR21 expression (Fig. 4C) were restored. Consequent changes of expression of miR21 related targets (PDCD4, Bcl2, PTEN) are shown in S4 (panels A–C). In addition, NADPH and eNOS protein expression were both rescued (S4, panels D, E). Both increased migration and increased contraction dependent on CC2238/ $\alpha$ ANP were abolished (S5).

**Impact of miR21 overexpression in the presence of CC2238/ $\alpha$ ANP**

In order to test whether the dramatic reduction of miR21 expression levels is involved in the detrimental effects induced by

CC2238/ $\alpha$ ANP in CASMCs, we overexpressed miR21 in cells exposed to variant  $\alpha$ ANP. Overexpression of miR21 was confirmed by RT-PCR (S6). Concomitant overexpression of miR21 with exposure to CC2238/ $\alpha$ ANP restored cell viability, reduced cell apoptosis and necrosis (Fig. S1C), reduced ROS levels (Fig. 5A), rescued phosphorylated Akt levels (Fig. 5B), increased eNOS and reduced NADPH expression (Fig. 5C, 5D). In this experimental condition, Bcl2 expression increased whereas both PTEN and PDCD4 expression decreased as expected (Fig. 6). Overexpression of miR21 reduced cell migration stimulated by CC2238/ $\alpha$ ANP, whereas it was unable to counteract the degree of cell contraction dependent on CC2238/ $\alpha$ ANP (S7).

Of note, miR21 overexpression alone was able to induce the expected changes on its own targets and on phosphoAkt levels (Fig. 5B, Fig. 6). Furthermore, the known stimulating effect on VSMC contraction [3] was confirmed (S7).

**ROS levels directly influence CASMC migration and contraction upon CC2238/ $\alpha$ ANP exposure**

As shown in S8, apocynin abolished the stimulation of both migration and contraction upon exposure to CC2238/ $\alpha$ ANP. The contribution of increased cAMP levels to migration and contraction (tested in the presence of FSK) was comparable to that of increased oxidative stress.

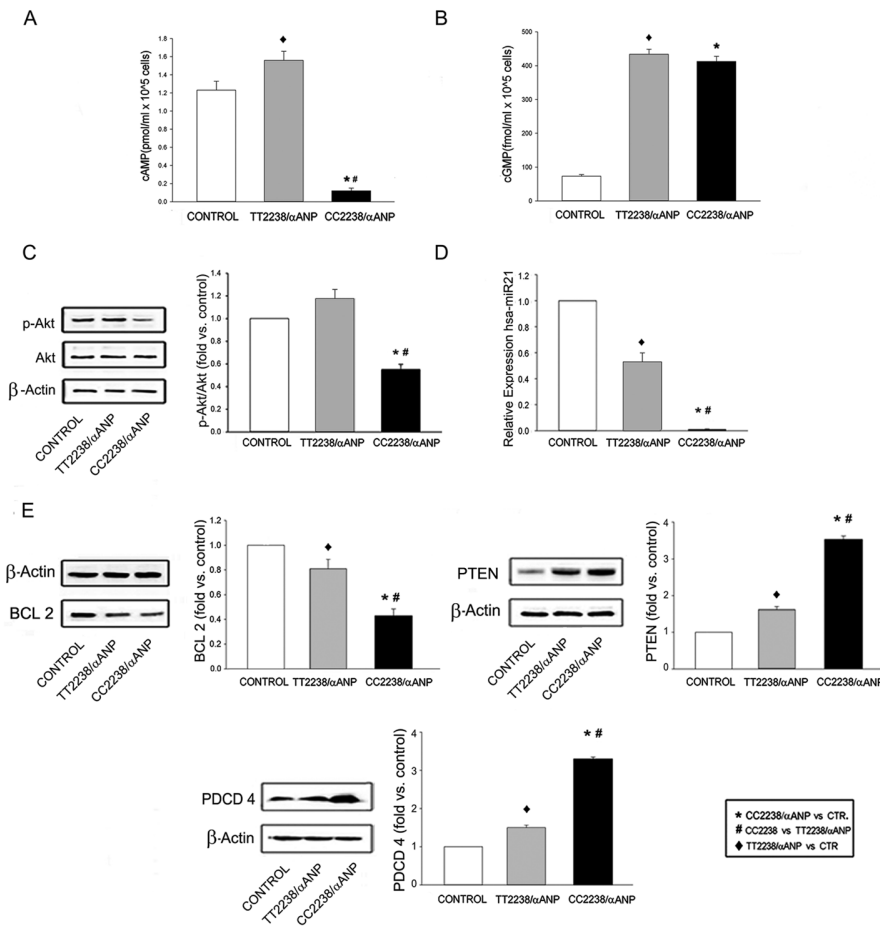

**Figure 3. Investigation of the signaling involved in the negative effects of CC2238/ $\alpha$ ANP in CASMCs.** cAMP (A) and cGMP (B) levels (number of experiments = 12) (for all comparisons  $p < 0.0001$ ); C. pAkt/Akt levels with representative western blot and results of densitometric analysis ( $n = 4$ ); D. hsa-miR21 expression levels as determined by RT-PCR ( $n = 6$ ) (for all comparisons  $p < 0.0001$ ); E. miR21 molecular targets expression levels under either TT2238/ $\alpha$ ANP or CC2238/ $\alpha$ ANP exposure ( $n = 3$ ). Representative western blots are shown; bars represent results of densitometric analysis. (♦  $p < 0.01$ ; for all other comparisons  $p < 0.0001$ ). CTR = control. doi:10.1371/journal.pone.0113108.g003

### cAMP/PKA/CREB axis modulates miR21 and phosphoAkt expression levels upon CC2238/ $\alpha$ ANP in CASMCs

Co-incubation of CC2238/ $\alpha$ ANP with FSK allowed a significant increase of both miR21 and phosphoAkt expression levels, as compared to cells treated with CC2238/ $\alpha$ ANP only (Fig. 7A, 7B, 7C). In the presence of concomitant exposure to CC2238/ $\alpha$ ANP, FSK and H89 both miR21 and phosphoAkt levels were unable to increase as much as in the presence of FSK only (Fig. 7). The same results were obtained when cells were exposed to CC2238/ $\alpha$ ANP, FSK and CREB inhibitor (Fig. 7). These data demonstrate that inhibition of cAMP/PKA/CREB axis does not allow the recovery of both miR21 and phosphoAkt expression levels in the presence of CC2238/ $\alpha$ ANP.

### Discussion

The present study explored the impact of CC2238/ $\alpha$ ANP in VSMCs, a fundamental cellular element for vessel wall physiology and disease, and it demonstrated for the first time that CC2238/ $\alpha$ ANP is a highly deleterious factor for coronary artery SMCs, as compared to wild type  $\alpha$ ANP.

The main original findings of the current set of data can be summarized as follows: 1) identification of a strong contribution of

miR21 suppression in mediating the deleterious effects on CASMC viability exerted by CC2238/ $\alpha$ ANP; 2) first demonstration that NPR-C/cAMP/PKA/CREB axis is involved in modulation of both miR21 and Akt phosphorylation in CASMCs upon CC2238/ $\alpha$ ANP; 3) first evidence that CC2238/ $\alpha$ ANP is a significant promoter of both CASMC migration and contraction, mainly dependent on ROS accumulation, and therefore it exerts vascular functional properties different from those of regular  $\alpha$ ANP (S9).

ANP is involved in the control of cardiac and vascular remodeling by performing anti-proliferative effects on cardiac, endothelial and SM cells [1,2,20]. Functional derangements due to either circulating peptide levels or peptide structure lead to pathological states within the cardiovascular system [21].

The common T2238C/ $\alpha$ ANP molecular variant has recently emerged as a novel cardiovascular risk factor for its ability to alter the physiological beneficial properties of regular  $\alpha$ ANP. Apart from the previously identified effects on EC viability and function [13,16], we now demonstrate its deleterious actions in VSMCs.

The effects of CC2238/ $\alpha$ ANP in CASMCs were mediated by NPR-C activation, similarly to what has been first discovered in ECs, and strictly dependent on the higher affinity binding of CC2238/ $\alpha$ ANP with NPR-C [13]. In fact, CC2238/ $\alpha$ ANP led to

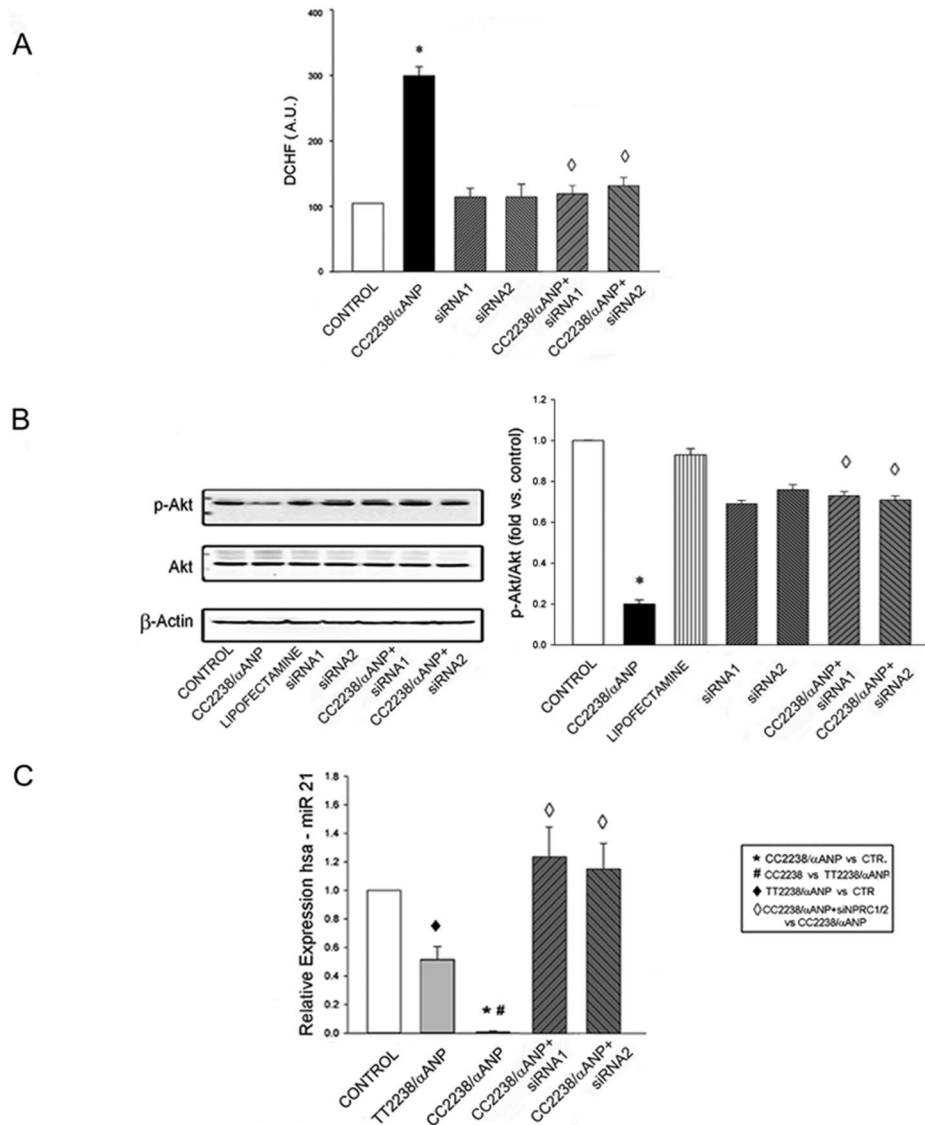

**Figure 4. Impact of NPR-C gene silencing on detrimental effects induced by CC2238/ $\alpha$ ANP in CASCs.** A. ROS levels (n=6); B. pAkt/Akt levels with representative western blot and results of densitometric analysis (n=3); C. miR21 expression levels in NPR-C gene silenced cells upon exposure to CC2238/ $\alpha$ ANP (n=6). Control (CTR): untreated cells; positive control: cells treated with H<sub>2</sub>O<sub>2</sub>. siRNA1 and siRNA2=small interfering RNAs for NPR-C gene silencing. For all comparisons p<0.0001. doi:10.1371/journal.pone.0113108.g004

a significant reduction of CASC viability and of cAMP levels, dependent on NPR-C driven adenylate cyclase inhibition, even when NPR-A was blocked by the use of anantin. Consistently, NPR-C gene silencing abolished all effects due to  $\alpha$ ANP variant. Of note, the functional consequences of pathological activation of NPR-C by CC2238/ $\alpha$ ANP strongly differ from those obtained through physiological stimulation with its agonist, i.e. CNP, mainly consisting in beneficial effects on vascular cells [22].

The microRNA-21, that is strongly involved in the effects dependent on CC2238/ $\alpha$ ANP in CASCs, is emerging as a fundamental protective factor for maintaining vitality and proliferation in several cell types and it has been found to be highly expressed in all main types of cardiovascular cells [23]. It plays important roles in VSMC proliferation and apoptosis through the targeting of PTEN, Bcl2 and PDCD4 proteins [17–19]. The known anti-proliferative effect of wild type  $\alpha$ ANP has been previously shown to associate with a decrease of miR21 in

aortic SMCs, whereas overexpression of miR21 restored VSMC proliferation [3]. In our experimental setting, we observed that miR21 levels were completely suppressed by CC2238/ $\alpha$ ANP as compared to wild type  $\alpha$ ANP (that caused 50% reduction). Accordingly, expression levels of miR21 molecular targets were remarkably changed by  $\alpha$ ANP variant. The miR-21 suppression appeared to be tightly related to all negative effects observed upon CC2238/ $\alpha$ ANP. In fact, overexpression of miR21 rescued expression levels of its molecular targets and of Akt phosphorylation, while restoring cell viability. Our results imply that suppression of miR21 upon CC2238/ $\alpha$ ANP contributes to cause detrimental effects in VSMCs, whereas reduction of miR21, mediated by cGMP dependent kinase, produces the physiological anti-proliferative effect of wild type  $\alpha$ ANP.

Notably, we support evidence that miR21 belongs to Akt regulatory network in cardiovascular cells, as an upstream factor, due to its ability to inhibit PTEN and to exert, through consequent

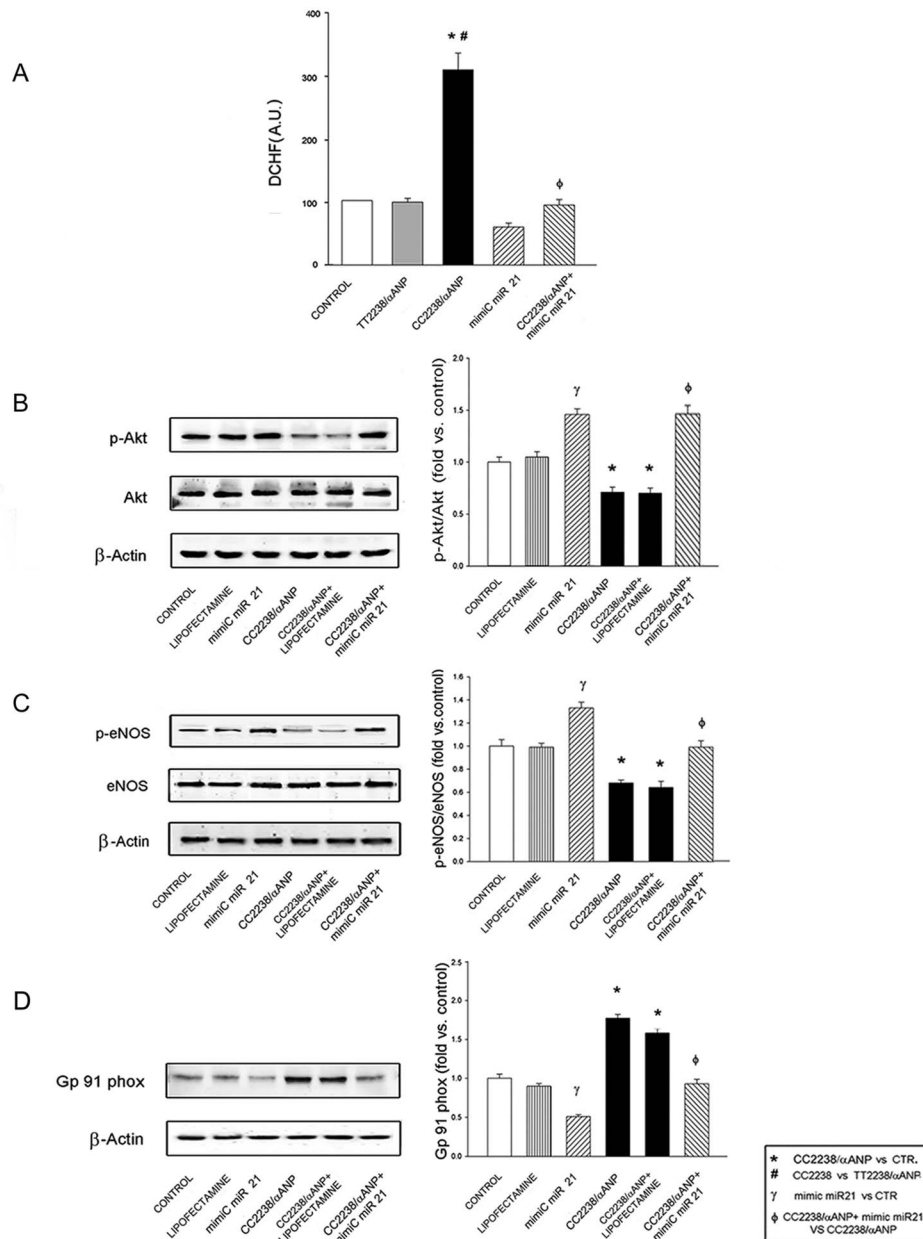

**Figure 5. Impact of miR21 overexpression in the presence of CC2238/ $\alpha$ ANP.** A. ROS levels (n=6); B. pAkt/Akt levels with representative western blot and results of densitometric analysis (n=3); eNOS (C) and NADPH (D) expression levels with representative western blot and results of densitometric analysis in cells overexpressing miR21 and concomitantly exposed to CC2238/ $\alpha$ ANP (n=3). Control (CTR): untreated cells; positive control: cells treated with H<sub>2</sub>O<sub>2</sub>. For all comparisons p<0.0001. doi:10.1371/journal.pone.0113108.g005

increased Akt activity, important effects on cell proliferation [17,24]. In fact, both PTEN and Akt represent key molecules for cell growth and survival, as well as for development of many cardiovascular diseases [25–27]. In our experimental context, miR21 suppression, dependent on CC2238/ $\alpha$ ANP, led to PTEN upregulation. In turn, miR21 overexpression reduced PTEN and, in the presence of CC2238/ $\alpha$ ANP, prevented the increase of PTEN expression. Finally, Akt phosphorylation was modulated in a manner consistent with PTEN changes.

Current knowledge on receptors involved in miRNA expression modulation is scarce. Activation of NPR-A has been suggested as the responsible mechanism for modulation of several miRNAs, including miR21, by wild type  $\alpha$ ANP in aortic SMCs [3]. We

provide original evidence that deregulated activation of NPR-C, upon exposure to variant  $\alpha$ ANP, suppresses expression levels of miR21 in CSMCs. In fact, cells exposed to CC2238/ $\alpha$ ANP, in the absence of NPR-C, showed regular expression levels of miR21.

Previous studies have shown the ability of cAMP/PKA to regulate expression levels of few miRNAs, such as miR1 [28], miR335 [29], and miR375 [30]. Herein, we report the first evidence that cAMP/PKA/CREB pathway modulates miR21 expression in CSMCs. In fact, PKA inhibition by H89 did not allow the recovery of miR21 levels in the presence of FSK, upon stimulation with CC2238/ $\alpha$ ANP. Inhibition of CREB, cAMP responsive element, by p300/CREB(CBP) led to identical results.



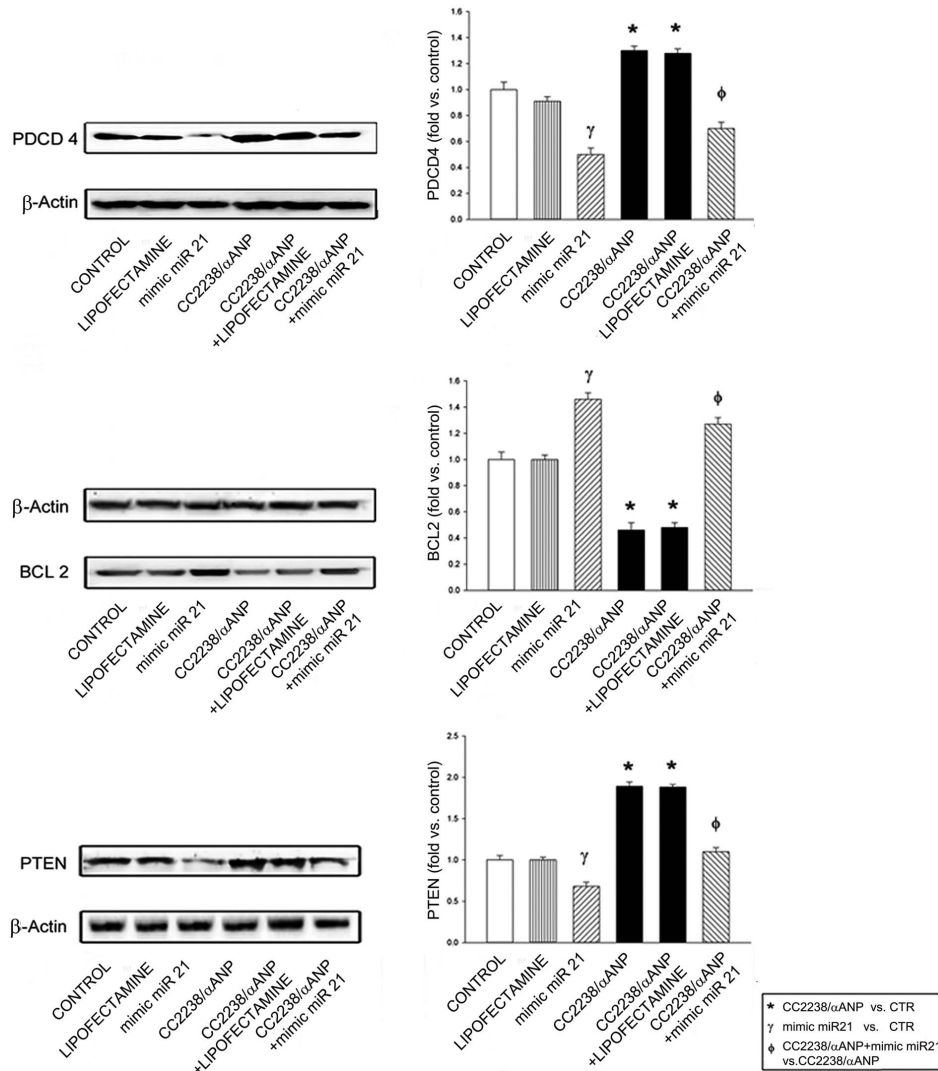

**Figure 6. miR21 targets expression levels under miR21 overexpression and concomitant exposure of CASMCs to CC2238/ $\alpha$ ANP.** Representative western blots are shown; bars represent results of densitometric analysis. Number of experiments = 4. For all comparisons  $p < 0.0001$ . CTR = control.

doi:10.1371/journal.pone.0113108.g006

Thus, we support knowledge on the ability of cAMP/PKA/CREB axis to regulate expression of miRNAs in vascular cells.

Migration and contraction are fundamental processes for vascular remodeling, proliferation and disease [31,32]. Herein, we show that CC2238/ $\alpha$ ANP is a strong promoter of CASMC migration and contraction, mainly dependent on ROS accumulation. In fact, decreases of ROS levels prevented both migration and contraction in the presence of  $\alpha$ ANP variant. The strong contribution of ROS to vascular cell migration and contraction are known [33,34].

It is also worthwhile observing that miR21, when overexpressed in the presence of  $\alpha$ ANP variant, antagonized the effect of the latter with regard to migration but it was unable to antagonize the contractile property of CC2238/ $\alpha$ ANP. This evidence is consistent with the notion that miR21 exerts VSMC contraction through an independent activation of DOCK proteins [35].

Notably, CC2238/ $\alpha$ ANP exerted CASMC contraction despite miR21 suppression. The demonstration of a significantly increased vasoconstriction dependent on CC2238/ $\alpha$ ANP, in contrast to the known vasodilation promoted by wild type  $\alpha$ ANP, represents an

important achievement of the current study. An increased vasoconstriction, along with the previously reported endothelial-dependent impaired vasorelaxation [13], constitutes a rational pathological substrate for higher predisposition to plaque instability and for an augmented rate of acute coronary and cerebrovascular events observed in CC2238/ $\alpha$ ANP carriers, as documented by several in vivo studies [7–12]. The recent demonstration that VSMCs stabilize atherosclerotic plaques [6] and that VSMC death and reduced proliferation promote plaque instability [36] further support our conclusions on the potential mechanisms, involving VSMCs, underpinning increased rate of acute cardiovascular events in CC2238/ $\alpha$ ANP carriers.

Few limitations of the study need to be acknowledged. We were unable to reproduce in vitro, for obvious technical limitations, the effects of the CT heterozygous peptide. On the other hand, it is assumed that heterozygous subjects carry 50% of both  $\alpha$ ANP forms.

In addition, although the current in vitro data were obtained in a cell line relevant for the human disease, we cannot extend them

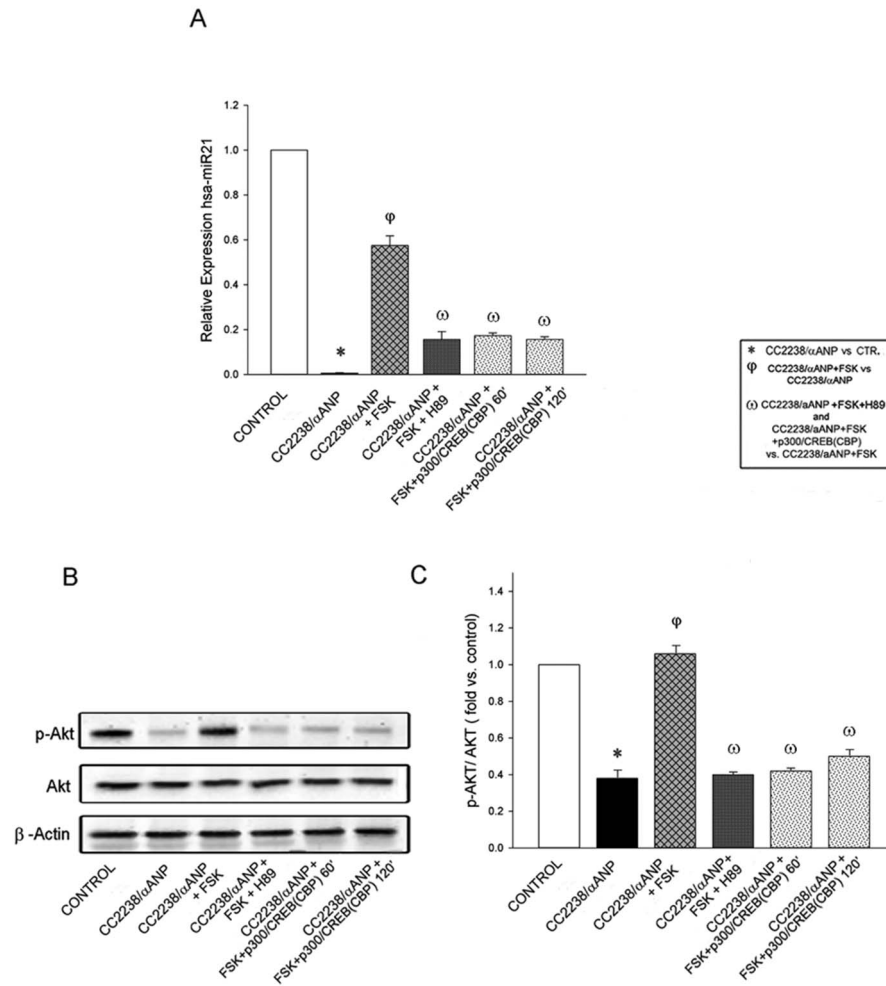

**Figure 7. Evidence that cAMP/PKA/CREB axis regulates miR21 expression and Akt phosphorylation in CASCs.** A. miR21 expression levels upon concomitant exposure of CASCs to: CC2238/ $\alpha$ ANP and FSK; CC2238/ $\alpha$ ANP, FSK and H89; CC2238/ $\alpha$ ANP, FSK and CREB inhibitor p300/CREB(CBP); the latter was pre-incubated either 60 or 120 min. followed by exposure to CC2238/ $\alpha$ ANP and FSK; B and C. pAkt/Akt expression levels in the same experimental conditions. Number of experiments = 6. For all comparisons  $p < 0.0001$ . doi:10.1371/journal.pone.01113108.g007

to other vascular beds. Finally, the in vivo implications of our findings remain to be assessed.

In conclusions, based on the current results, CC2238/ $\alpha$ ANP exerts deleterious effects on viability and function of CASCs and it does it through binding with NPR-C, involvement of cAMP/PKA/CREB/miR21 pathway and marked increase of oxidative stress. The reduced proliferation and increased contraction of CASCs may contribute to explain the augmented rate of acute coronary events in CC2238/ $\alpha$ ANP carriers. Pharmacological targeting of molecular pathways activated by CC2238/ $\alpha$ ANP may be proposed as a valuable strategy to reduce cardiovascular risk in subjects bearing this  $\alpha$ ANP variant.

## Supporting Information

**Figure S1 Graphical representation of FACS analysis in the different experimental settings.** Bars represent counts of live cells, early and late apoptotic cells, necrotic cells upon exposure of CASCs to CC2238/ $\alpha$ ANP alone (A), in the presence of NPR-C gene silencing (B), and in the presence of miR21 overexpression (C). siRNA1 and siRNA2 = small interfering RNAs for NPR-C gene silencing. Number of experiments = 4.

For all comparisons of CC2238/ $\alpha$ ANP vs other treatments:  $p < 0.0001$ .

(TIF)

**Figure S2 A. cGMP levels in response to different concentrations of both TT2238- and CC2238/ $\alpha$ ANP (number of experiments = 5); B. Left panel = CASC vitality as assessed by trypan blue upon CC2238/ $\alpha$ ANP exposure in the presence of anantin; levels of cGMP (middle panel) and of cAMP (right panel) upon CC2238/ $\alpha$ ANP exposure in the presence of anantin (number of experiments = 4); For all comparisons:  $p < 0.05$ .**

(TIF)

**Figure S3 miR21 expression levels upon TT2238/ $\alpha$ ANP either in the absence or in the presence of cGK inhibitor.**

Number of experiments = 3. For all comparisons:  $p < 0.05$ .

(TIF)

**Figure S4 Impact of NPR-C gene silencing on protein expression levels upon concomitant exposure to CC2238/ $\alpha$ ANP.** miR21 targets expression levels (A, B, C); NADPH (D) and eNOS (E) expression levels. Representative western blots are shown; bars represent results of densitometric

analysis. Number of experiments = 4. For all comparisons  $p < 0.0001$ . CTR = control.

(TIF)

**Figure S5 Impact of NPR-C gene silencing on cell migration and cell contraction upon concomitant exposure to CC2238/ $\alpha$ ANP.** Photos of cell migration (A) and of cell contraction (B) under NPR-C gene silencing in the presence of CC2238/ $\alpha$ ANP. Results are plotted in the graphs at the bottom of the figure. siRNA1 and siRNA2 = small interfering RNAs for NPR-C gene silencing. Number of experiments = 6. For all comparisons  $p < 0.0001$ .

(TIF)

**Figure S6 Overexpression of miR21 in CASMCs confirmed by RT-PCR.** Overexpression was verified at both 2 (A) and 4 (B) days following transfection. Number of experiments = 3.

(TIF)

**Figure S7 Impact of miR21 overexpression on cell migration and cell contraction upon concomitant exposure to CC2238/ $\alpha$ ANP.** Photos of cell migration (A) and of cell contraction (B) under miR21 overexpression and concomitant exposure to CC2238/ $\alpha$ ANP. Results are plotted in the graphs at

the bottom of the figure. Number of experiments = 7. For all comparisons  $p < 0.0001$ .

(TIF)

**Figure S8 Impact of co-incubation of CC2238/ $\alpha$ ANP with apocynin and FSK on both cell migration and cell contraction.** Photos of cell migration (A) and of cell contraction (B) upon exposure of CASMCs to CC2238/ $\alpha$ ANP with or without apocynin and FSK. Results are plotted in the graphs at the bottom of the figure. Number of experiments = 5. FSK = forskolin. For all comparisons  $p < 0.0001$ .

(TIF)

**Figure S9 Schematic representation of the proposed pathways underlying the deleterious effects on cell viability and function exerted by CC2238/ $\alpha$ ANP in CASMCs through pathological involvement of NPR-C.**

(TIF)

## Author Contributions

Conceived and designed the experiments: SR. Performed the experiments: SM FB SDC RS MC. Analyzed the data: SR CB SS. Contributed reagents/materials/analysis tools: SS CB. Contributed to the writing of the manuscript: SR SS MV.

## References

- Rubattu S, Sciarretta S, Valenti V, Stanzione R, Volpe M (2008) Natriuretic peptides: an update on bioactivity, potential therapeutic use and implication in cardiovascular diseases. *Am J Hypertens* 21: 733–741.
- Morishita R, Gibbons GH, Pratt RE, Tomita N, Kaneda Y, et al. (1994) Autocrine and paracrine effects of atrial natriuretic peptide gene transfer on vascular smooth muscle and endothelial cellular growth. *J Clin Invest* 94: 824–829.
- Koto KU, Hesabi B, Danziger RS (2011) Implication of microRNAs in atrial natriuretic peptide and nitric oxide signaling in vascular smooth muscle cells. *Am J Physiol Cell Physiol* 301: C929–C937.
- Owens GK, Kumar MS, Wamhoff BR (2004) Molecular regulation of vascular smooth muscle cell differentiation in development and disease. *Physiol Rev* 84: 767–801.
- Ip JH, Fuster V, Badimon I, Badimon J, Taubman MB, et al. (1990) Syndromes of accelerated atherosclerosis: role of vascular injury and smooth muscle cell proliferation. *J Am Coll Cardiol* 15: 1667–1687.
- Wang X-P, Zhang W, Liu X-Q, Wang W-K, Yan F, et al. (2014) Arginase I enhances atherosclerotic plaque stabilization by inhibiting inflammation and promoting smooth muscle cell proliferation. *Eur Heart J* 35: 911–919.
- Gruchala M, Cieciewicz D, Wasag B, Targonski R, Dubaniciewicz W, et al. (2003) Association of the ScaI atrial natriuretic peptide gene polymorphism with nonfatal myocardial infarction and extent of coronary artery disease. *Am Heart J* 145: 125–131.
- Rubattu S, Stanzione R, Di Angelantonio E, Zanda B, Evangelista A, et al. (2004) Atrial natriuretic peptide gene polymorphisms and risk of ischemic stroke in humans. *Stroke* 35: 814–818.
- Barbato E, Bartunek J, Mangiacapra F, Sciarretta S, Stanzione R, et al. (2012) Influence of rs5065 atrial natriuretic peptide gene variant on coronary artery disease. *J Am Coll Cardiol* 59: 1763–1770.
- Cannone V, Huntley BK, Olson TM, Heublein DM, Scott CG, et al. (2013) Atrial natriuretic peptide gene variant rs5065 and risk for cardiovascular disease in the general community: a 9-year follow-up study. *Hypertension* 62: 860–865.
- Ziaee S, Kalayinia S, Boroumand MA, Pourgholi L, Cheraghi S, et al. (2014) Association between the atrial natriuretic peptide rs5065 gene polymorphism and the presence and severity of coronary artery disease in an Iranian population. *Coron Artery Dis* 25: 242–246.
- Rubattu S, De Giusti M, Farcomeni A, Abbolito S, Comito F, et al. (2014) T2238C ANP gene variant and risk of recurrent acute coronary syndromes in an Italian cohort of ischemic heart disease patients. *J Cardiovasc Med* in press.
- Sciarretta S, Marchitti S, Bianchi F, Moyes A, Barbato E, et al. (2013) The C2238 atrial natriuretic peptide molecular variant is associated with endothelial damage and dysfunction through natriuretic peptide receptor C signaling. *Circ Res* 112: 1355–1364.
- Lin X, Hanze J, Heese F, Sodomann R, Lang RE (1995) Gene expression of natriuretic peptide receptors in myocardial cells. *Circ Res* 77: 750–758.
- Weber W, Fischli W, Hochuli E, Kupfer E, Weibel EK. (1991) Anantin—a peptide antagonist of the atrial natriuretic factor (ANF). I. Producing organism, fermentation, isolation and biological activity. *J Antibiot* 44: 164–171.
- Scarpino S, Marchitti S, Stanzione R, Evangelista A, Di Castro S, et al. (2009) ROS-mediated differential effects of the human atrial natriuretic peptide T2238C genetic variant on endothelial cells *in vitro*. *J Hypertens* 27: 1804–1813.
- Ji R, Cheng Y, Yue J, Yang J, Liu X, et al. (2007) MicroRNA expression signature and antisense-mediated depletion reveal an essential role of microRNA in vascular neointima formation. *Circ Res* 100: 1579–1588.
- Quintavalle C, Garofalo M, Croce CM, Condorelli G (2011) ApoptomiRs in vascular cells: their role in physiological and pathological angiogenesis. *Vascul Pharmacol* 55: 87–91.
- Song JT, Hu B, Yan Qu H, Bi CI, Huang XZ, et al. (2012) Mechanical stretch modulates MicroRNA 21 expression, participating in proliferation and apoptosis in cultured human aortic smooth muscle cells. *Plos One* 7: e47657.
- Hiroshi I, Pratt RE, Dzau VJ (1990) Atrial natriuretic polypeptide inhibits hypertrophy of vascular smooth muscle cells. *J Clin Invest* 86: 1690–1697.
- Volpe M, Rubattu S, Burnett J Jr (2014). Natriuretic peptides in cardiovascular diseases: current use and perspectives. *Eur Heart J* 35: 419–425.
- Villar IC, Panayiotou CM, Sheraz A, Madhani M, Scotland RS, et al. (2007) Definitive role for natriuretic peptide receptor-C in mediating the vasorelaxant activity of C-type natriuretic peptide and endothelium-derived hyperpolarising factor. *Cardiovasc Res* 74: 515–525.
- Cheng Y, Zhang C (2010) MicroRNA-21 in cardiovascular disease. *J Cardiovasc Trans Res* 3: 251–255.
- Roy S, Khanna S, Hussain SR, Biswas S, Azad A, et al. (2009) MicroRNA expression in response to murine myocardial infarction: miR-21 regulates fibroblast metalloprotease-2 via phosphatidate and tensin homologue. *Cardiovasc Res* 82: 21–29.
- Oudit GY, Sun H, Kerfant BG, Crackower MA, Penninger JM, et al. (2004) The role of phosphoinositide-3 kinase and PTEIN in cardiovascular physiology and disease. *J Mol Cell Cardiol* 37: 449–471.
- Bellis A, Castaldo D, Trimarco V, Monti MG, Chivasso P, et al. (2009) Crosstalk between PKA and Akt protects endothelial cells from apoptosis in the late ischemic preconditioning. *Arterioscler Thromb Vasc Biol* 29: 1207–1212.
- Lovren F, Pan Y, Shukla PC, Quan A, Teoh H, et al. (2009). Visfatin activates eNOS via Akt and MAP kinases and improves endothelial cell function and angiogenesis *in vitro* and *in vivo*: translational implications for atherosclerosis. *Am J Physiol Endocrinol Metab* 296: E1440–E1449.
- Lu Y, Zhang Y, Shan H, Pan Z, Li X, et al. (2009) MicroRNA-1 downregulation by propranolol in a rat model of myocardial infarction: a new mechanism for ischaemic cardioprotection. *Cardiovasc Res* 84: 434–441.
- Shu M, Zhou Y, Zhu W, Zhang H, Wu S, et al. (2012) MicroRNA 335 is required for differentiation of malignant glioma cells induced by activation of cAMP/Protein Kinase A pathway. *Mol Pharmacol* 81: 292–298.
- Keller DM, Clark EA, Goodman RH (2012) Regulation of microRNA-375 by cAMP in pancreatic  $\beta$ -cells. *Mol Endocrinol* 26: 989–999.
- Ridley AJ, Schwartz MA, Burridge K, Firtel RA, Ginsberg MH, et al. (2003) Cell migration: integrating signals from front to back. *Science* 302: 1704–1709.
- Schwartz SM, Campbell GR, Campbell JH (1986) Replication of smooth muscle cells in vascular disease. *Circ Res* 58: 427–444.
- Zhou Y, Yan H, Guo M, Zhu J, Xiao Q, et al. (2013) Reactive oxygen species in vascular formation and development. *Oxid Med Cell Longev* 2013: 374963.

34. Zimmerman MC, Takapoo M, Jagadeesha DK, Stanic B, Banfi B, et al. (2011) Activation of NADPH oxidase 1 increases intracellular calcium and migration of smooth muscle cells. *Hypertension* 58: 446–453.
35. Kang H, Davis-Dusenbery BN, Nguyen PH, Lal A, Lieberman J, et al. (2012) Bone morphogenetic protein 4 promotes vascular smooth muscle contractility by activating microRNA-21 (miR-21), which down-regulates expression of family of dedicator of cytokinesis (DOCK) proteins. *J Biol Chem* 287: 3976–3986.
36. Martínez-Hervas S, Vinue A, Nunez L, Andres-Blasco I, Piqueras L, et al. (2014) Insulin resistance aggravates atherosclerosis by reducing vascular smooth muscle cell survival and increasing CX<sub>3</sub>CL1/CX<sub>3</sub>CR1 axis. *Cardiovasc Res* 103: 324–336.
